# Supplementary material for: Luminescent properties of dye–PMMA composite nanospheres
Source: Royal Society of Chemistry journal article supplement (doi:10.1039/c0cp00929f), 2010-11-22

## **Supplementary Information**

# **Luminescent Properties of Dye-PMMA Composite Nanospheres**

Xumei Wang, Shuping Xu, Weiqing Xu\*

State Key Laboratory of Supramolecular Structure and Materials, Jilin University,  
Changchun 130012, P. R. China

\*To whom correspondence should be addressed.

Tel: +86-431-85159383. Fax: +86-431-85193421. E-mail: xuwq@jlu.edu.cn.

The decay curves of the Em-PMMA (A) and Ad-PMMA (B) NPs aqueous solutions and their double exponential function fit curves.

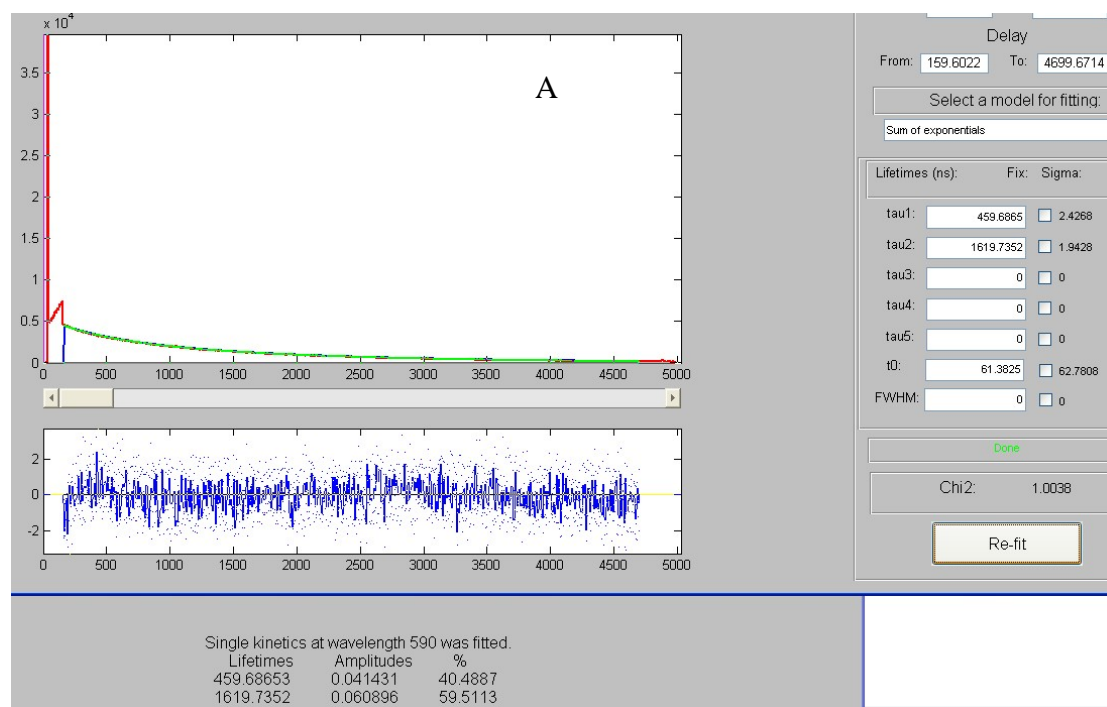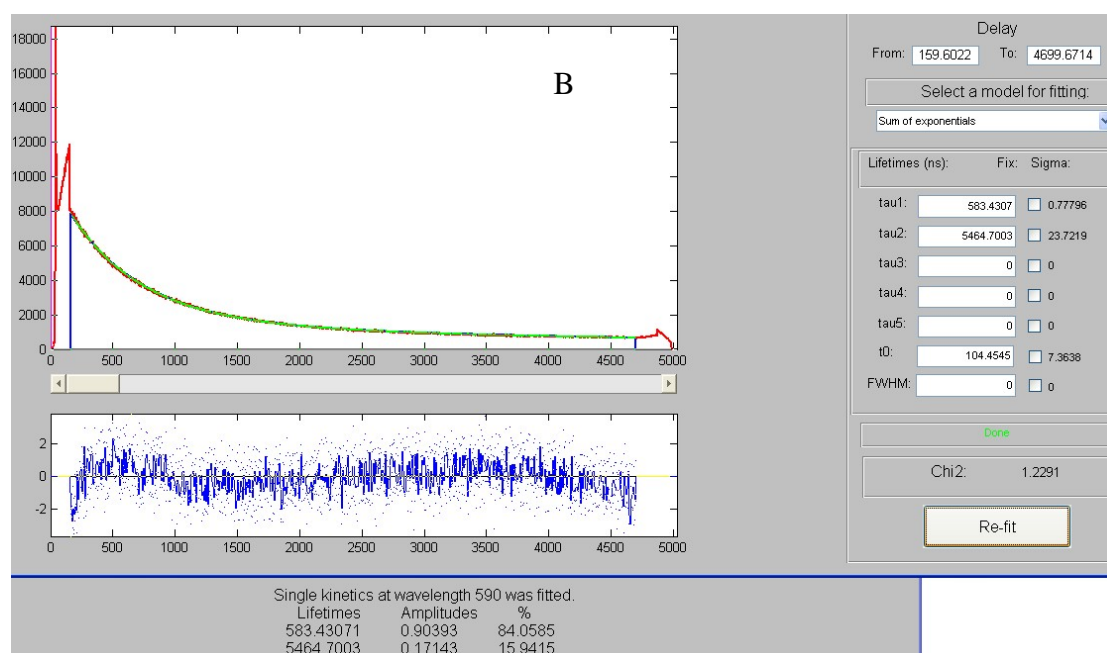

Supplement: c0cp00929f.pdf [file c0cp00929f.pdf]
